# Supplementary material for: MdATG18a overexpression improves basal thermotolerance in transgenic apple by decreasing damage to chloroplasts
Source: PubMed Central journal article supplement (PMC7049305; doi:10.1038/s41438-020-0243-2), 2020-03-01
Supplement: 41438_2020_243_MOESM1_ESM.pdf [file 41438_2020_243_MOESM1_ESM.pdf]

Supplemental Table Primers used in this study

| Gene             | Sequence (5'-3')          | Purpose                                     |
|------------------|---------------------------|---------------------------------------------|
| <i>MDH</i>       | F: CGTGATTGGGTACTTGGAAC   | Reference gene used in real-time PCR        |
|                  | R: TGGCAAGTGACTGGGAATGA   |                                             |
| qc <i>APX</i>    | F: AACTACAAGGGATGAAGCC    | Quantitative expression of <i>MdcAPX</i>    |
|                  | R: CAACGAGGATGATAACCAG    |                                             |
| qc <i>GR</i>     | F: GTTCAGCGACAAGGCGTAT    | Quantitative expression of <i>MdcGR</i>     |
|                  | R: TCAACCGATTTCATTTC      |                                             |
| q <i>MDHAR</i>   | F: CCATACTTCTATTCCCGCTCCT | Quantitative expression of <i>MdMDHAR</i>   |
|                  | R: CGACCACCTTCCCGTCTTT    |                                             |
| q <i>DHAR1</i>   | F: AGTGGACGGTTCAGCAGA     | Quantitative expression of <i>MdDHAR1</i>   |
|                  | R: TTCCCATCCCGCAATCAC     |                                             |
| q <i>HY5</i>     | F: AACTAGCATCCAAAGCTAGCC  | Quantitative expression of <i>MdHY5</i>     |
|                  | R: CCACAGTCTGCAGTTTCACAAG |                                             |
| q <i>DREB2A</i>  | F: CAGAGAACTTCACAACCGAC   | Quantitative expression of <i>MdDREB2A</i>  |
|                  | R: CCAGTGCTCATGGCAAGGTTTT |                                             |
| q <i>HSP17.3</i> | F: AAGTTTGTGTTGCCGGAG     | Quantitative expression of <i>MdHSP17.3</i> |
|                  | R: ATGTTATAATCCCTGCACGA   |                                             |
| q <i>HSP70-2</i> | F: CTCTGTCTCTCGGTTTGGAG   | Quantitative expression of <i>MdHSP70-2</i> |
|                  | R: GTCTTGTCTCGGCAGAAA     |                                             |
| q <i>HSP90-5</i> | F: AACTCACTTCACCACTGAG    | Quantitative expression of <i>MdHSP90-5</i> |
|                  | R: CATTTGAATCCACCACACCC   |                                             |
| q <i>HSP101</i>  | F: CTATTCGGAGATGGCTGGAG   | Quantitative expression of <i>MdHSP101</i>  |
|                  | R: TGATGGAGGAAAGGAATT     |                                             |
| q <i>CAB</i>     | F: ATCTTGATGGGTGCCGTGGAG  | Quantitative expression of <i>MdCAB</i>     |
|                  | R: AGCCTCTGTGTCTTCTGCAAGG |                                             |
| q <i>RBCS</i>    | F: AAACTGGGTTCCCTGCTTGGGA | Quantitative expression of <i>MdRBCS</i>    |
|                  | R: GGCAGCTTCCACATTGTCCAG  |                                             |
| q <i>ATG3a</i>   | F: AAGGGGGCGGAGATGGTTC    | Quantitative expression of <i>MdATG3a</i>   |
|                  | R: GCACTTAGAGACGAGTTATCGC |                                             |
| q <i>ATG3b</i>   | F: AGGGAGATGGTTTTGAAACAGA | Quantitative expression of <i>MdATG3b</i>   |
|                  | R: ACTTAGAGACGAGGTTATCGC  |                                             |
| q <i>ATG5</i>    | F: GCAGGTCGTGTTCCAGTTC    | Quantitative expression of <i>MdATG5</i>    |
|                  | R: CCTCCTCCTCCTTGTATCTCAA |                                             |
| q <i>ATG8c</i>   | F: GCGTTCAAGATGGAGCACCCTC | Quantitative expression of <i>MdATG8c</i>   |
|                  | R: CAGCCCTTCCACAACCACTGG  |                                             |
| q <i>ATG8f</i>   | F: TCGTAGACAATGTCCTCCAGC  | Quantitative expression of <i>MdATG8f</i>   |
|                  | R: CCAAATGTGTTCTCGCCACTGT |                                             |
| q <i>ATG8i</i>   | F: GCAGCAGGCTTCACTTGACTCC | Quantitative expression of <i>MdATG8i</i>   |
|                  | R: GGAATCCATGCGACTGGCTGTT |                                             |
| q <i>ATG10</i>   | F: TGGAACCAGCGAGTGGATGAAG | Quantitative expression of <i>MdATG10</i>   |
|                  | R: ACAACTGAGAGCCAAGACACCA |                                             |
